# Supplementary material for: Emission enhancement of a carbazole-based fluorophore on a quantum dot surface
Source: Royal Society of Chemistry journal article supplement (doi:10.1039/c2pp25281c), 2012-10-02

## Supporting Information

### Emission Enhancement of a Carbazole-based Fluorophore on Quantum Dot Surface

Puran K. De\* and Douglas C. Neckers

Center for Photochemical Sciences, Bowling Green State University, Bowling Green, OH 43403.

*pde@bgsu.edu*

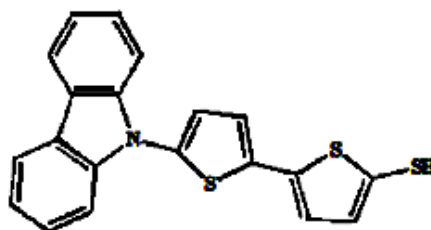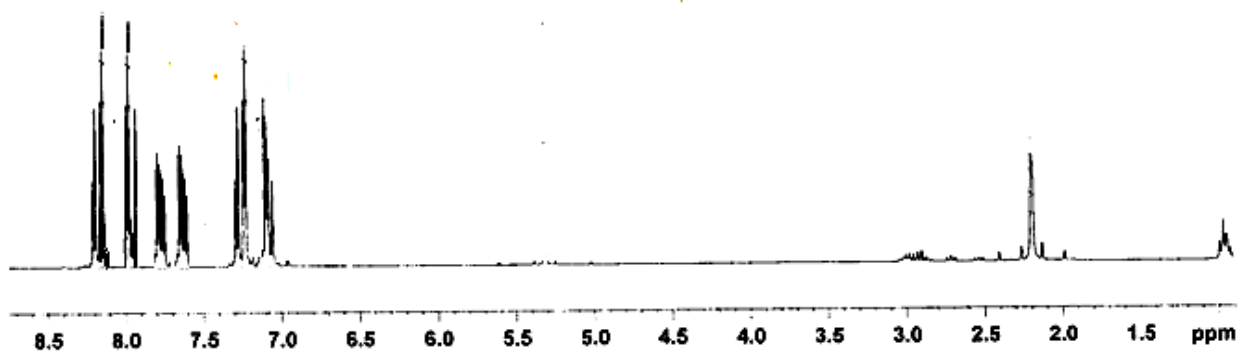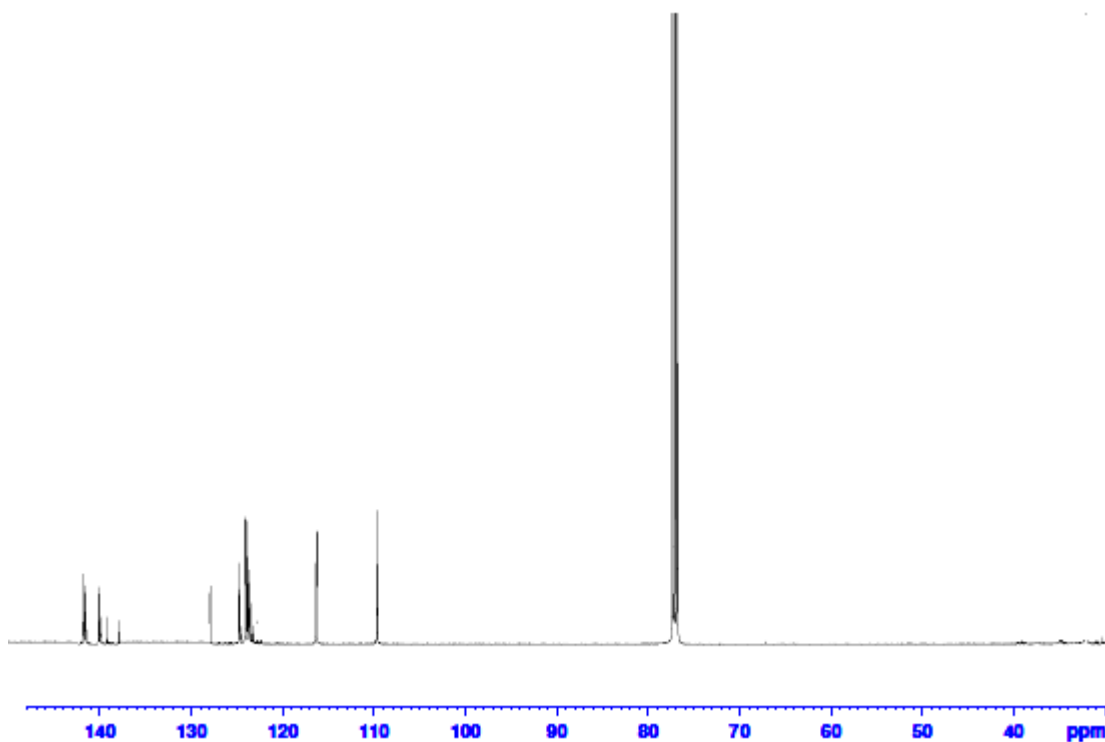

Supplement: c2pp25281c.pdf [file c2pp25281c.pdf]
